# Supplementary material for: Characterisation of taste-active extracts from raw Brassica oleracea vegetables
Source: Royal Society of Chemistry journal article supplement (doi:10.1039/c2fo30192j), 2013-01-01
Supplement: c2fo30192j.pdf [file c2fo30192j.pdf]

## Supplementary material

**Table S1** Definition of taste attributes and reference standards used during the sensory evaluation of the *Brassica* whole extracts and their fractions.

| <b>Taste Attribute</b> | <b>Definition</b>                                                             | <b>Anchor</b> | <b>Reference Standards</b>             |
|------------------------|-------------------------------------------------------------------------------|---------------|----------------------------------------|
| Sweet                  | The perceived intensity of the sweet taste - defined by basic taste solution  | Low to high   | Sucrose (2% and 16% )                  |
| Salty                  | The perceived intensity of the salty taste - defined by basic taste solution  | Low to high   | Salt (0.2% and 0.7%)                   |
| Sour                   | The perceived intensity of the sour taste - defined by basic taste solution   | Low to high   | Citric acid (0.05% and 0.2%)           |
| Bitter                 | The perceived intensity of the bitter taste - defined by basic taste solution | Low to high   | Caffeine (0.05% and 0.2%)              |
| Umami                  | The perceived intensity of the umami taste - defined by basic taste solution  | Low to high   | Monosodium glutamate (0.18% and 0.45%) |

**Table S2** LC-MS/MS parameters used during the detection of glucosinolates by negative electrospray.

| <b>Glucosinolate</b>    | <b>Precursor ion<br/>[M-H]<sup>-</sup></b> | <b>Product ion<br/>[SO<sub>3</sub>H]<sup>-</sup></b> | <b>Collision<br/>energy (eV)</b> | <b>Retention<br/>time (min)<sup>a</sup></b> |
|-------------------------|--------------------------------------------|------------------------------------------------------|----------------------------------|---------------------------------------------|
| Glucoiberin             | 422                                        | 97                                                   | 27                               | 3.30                                        |
| Progoitrin              | 388                                        | 97                                                   | 30                               | 3.31                                        |
| Sinigrin                | 358                                        | 97                                                   | 32                               | 3.32                                        |
| Glucoraphanin           | 436                                        | 97                                                   | 32                               | 3.32                                        |
| Gluconapin              | 372                                        | 97                                                   | 26                               | 6.31                                        |
| Glucotrapeolin (ISTD)   | 408                                        | 97                                                   | 27                               | 7.71                                        |
| Glucoerucin             | 420                                        | 97                                                   | 27                               | 7.12                                        |
| Glucobrassicin          | 447                                        | 97                                                   | 27                               | 8.01                                        |
| Glucosylsin             | 450                                        | 97                                                   | 27                               | 8.04                                        |
| 4-methoxyglucobrassicin | 477                                        | 97                                                   | 27                               | 8.82                                        |
| Neoglucobrassicin       | 477                                        | 97                                                   | 27                               | 9.61                                        |

<sup>a</sup> Separation conditions as described under Materials and Methods.

**Table S3** Phenolic components detected in the *B. olearacea* whole extracts by diode array detection (DAD) and electrospray mass spectrometry (ESI-MS). Component numbers refer to those found in Fig. S1.

| Tentative identity                 | No. | DAD (nm)  | ESI-MS: [M-H] <sup>-</sup><br>(frag. MS <sup>2</sup> m/z) |
|------------------------------------|-----|-----------|-----------------------------------------------------------|
| Unknown                            | 1   | 320       | 261                                                       |
| Neochlorogenic acid                | 2   | 332,295sh | 353 (191)                                                 |
| Chlorogenic acid                   | 3   | 332,295sh | 353 (191)                                                 |
| Sinapic acid                       | 4   | 324       | 223                                                       |
| 1,2-disinapoylgentiobiose          | 5   | 328       | 753 (529,223)                                             |
| 1-sinapoyl-2-feruloylgentiobiose   | 6   | 328,295sh | 723 (499,223)                                             |
| 1,2-diferuloylgentiobiose          | 7   | 328,290sh | 693 (499,193)                                             |
| 1,2,2-trisinapoylgentiobiose       | 8   | 328       | 959 (735,223)                                             |
| 1,2-disinapoyl-2-feroylgentiobiose | 9   | 328,295sh | 929 (705,223)                                             |
| 1-sinapoyl-2,2-diferoylgentiobiose | 10  | 320,290sh | 899 (705,223)                                             |

**Table S4** Anthocyanins detected in the red cabbage whole extract by electrospray mass spectrometry (ESI-MS). Component numbers refer to those found in Fig. S2.

| Tentative identity                                           | No. | ESI-MS: [M+H] <sup>+</sup><br>(frag. MS <sup>2</sup> m/z) |
|--------------------------------------------------------------|-----|-----------------------------------------------------------|
| Cyanidin-3-diglucoside-5-glucoside                           | -   | 773 (611,449,287)                                         |
| Cyanidin-3-(sinapoyl)-diglucoside-5-glucoside                | 1   | 979 (817,449,287)                                         |
| Cyanidin-3-(feruloyl)-diglucoside-5-glucoside                | -   | 949 (787,449,287)                                         |
| Pelargonidin glucoside                                       | -   | 433 (271)                                                 |
| Cyanidin-3-(caffeoyl-coumaroyl)-diglucoside-5-glucoside      | 2   | 1081 (919,449,287)                                        |
| Cyanidin-3-(glucopyranosyl-feruloyl)-diglucoside-5-glucoside | 3   | 1111 (949,703,449)                                        |
| Cyanidin-3-(glucopyranosyl-sinapoyl)-diglucoside-5-glucoside | 4   | 1141 (979,817,449)                                        |
| Cyanidin-3-(sinapoyl)-diglucoside-5-glucoside                | -   | 979 (817,449,287)                                         |
| Cyanidin-3-(feruloyl)-(feruloyl)-triglucoside-5-glucoside    | 5   | 1287 (1125,963,449)                                       |
| Cyanidin-3-(sinapoyl)-(sinapoyl)-triglucoside-5-glucoside    | 6   | 1347 (1185,1023,449)                                      |
| Cyanidin-3-(sinapoyl)-(feruloyl)-triglucoside-5-glucoside    | 7   | 1317 (1155,993,449)                                       |
| Cyanidin-3-(coumaroyl)-diglucoside-5-glucoside               | 8   | 919 (757,449,287)                                         |
| Cyanidin-3-(sinapoyl)-diglucoside-5-glucoside                | 9   | 979 (817,449,287)                                         |
| Cyanidin-3-(feruloyl)-diglucoside-5-glucoside                | 10  | 949 (787,449,287)                                         |
| Cyanidin-3-(feruloyl)-(feruloyl)-diglucoside-5-glucoside     | 11  | 1125 (963,449,287)                                        |
| Cyanidin-3-(sinapoyl)-(feruloyl)-diglucoside-5-glucoside     | 12  | 1155 (993,449,287)                                        |
| Cyanidin-3-(sinapoyl)-(sinapoyl)-diglucoside-5-glucoside     | 13  | 1185 (1023,449,287)                                       |

**Table S5** Concentration of free sugars in fractions from whole *Brassica* extracts as determined by HPLC with refractive index detection. Only fractions with detectable concentration of sugars are shown (Fr1 = fraction 1, Fr2 = fraction 2, Fr3 = fraction 3).

|          | <b>Broccoli</b>                 |         |         | <b>Cauliflower</b> |         |         | <b>Red cabbage</b> |         |         | <b>Brussels sprouts</b> |         |         |
|----------|---------------------------------|---------|---------|--------------------|---------|---------|--------------------|---------|---------|-------------------------|---------|---------|
|          | Fr1                             | Fr2     | Fr3     | Fr1                | Fr2     | Fr3     | Fr1                | Fr2     | Fr3     | Fr1                     | Fr2     | Fr3     |
|          | Concentration (mean±std, mg/mL) |         |         |                    |         |         |                    |         |         |                         |         |         |
| Fructose | 36.2±1.9                        | 0.2±0.0 | 0.1±0.0 | 24.3±0.8           | 0.8±0.2 | 0.2±0.0 | 22.9±0.9           | 0.6±0.0 | 0.4±0.0 | 15.5±0.3                | 0.7±0.1 | 0.2±0.1 |
| Glucose  | 26.6±0.8                        | 0.2±0.1 | 0.1±0.0 | 23.5±0.7           | 0.9±0.2 | 0.1±0.1 | 30.9±0.2           | 1.0±0.1 | 0.7±0.0 | 18.8±0.2                | 0.3±0.1 | 0.2±0.0 |
| Sucrose  | 8.8±0.5                         | 1.0±0.2 | 0.1±0.0 | 4.5±0.1            | 0.5±0.0 | 0.2±0.0 | 7.3±0.3            | 0.4±0.1 | 0.4±0.1 | 8.6±0.1                 | 0.8±0.2 | 0.2±0.0 |

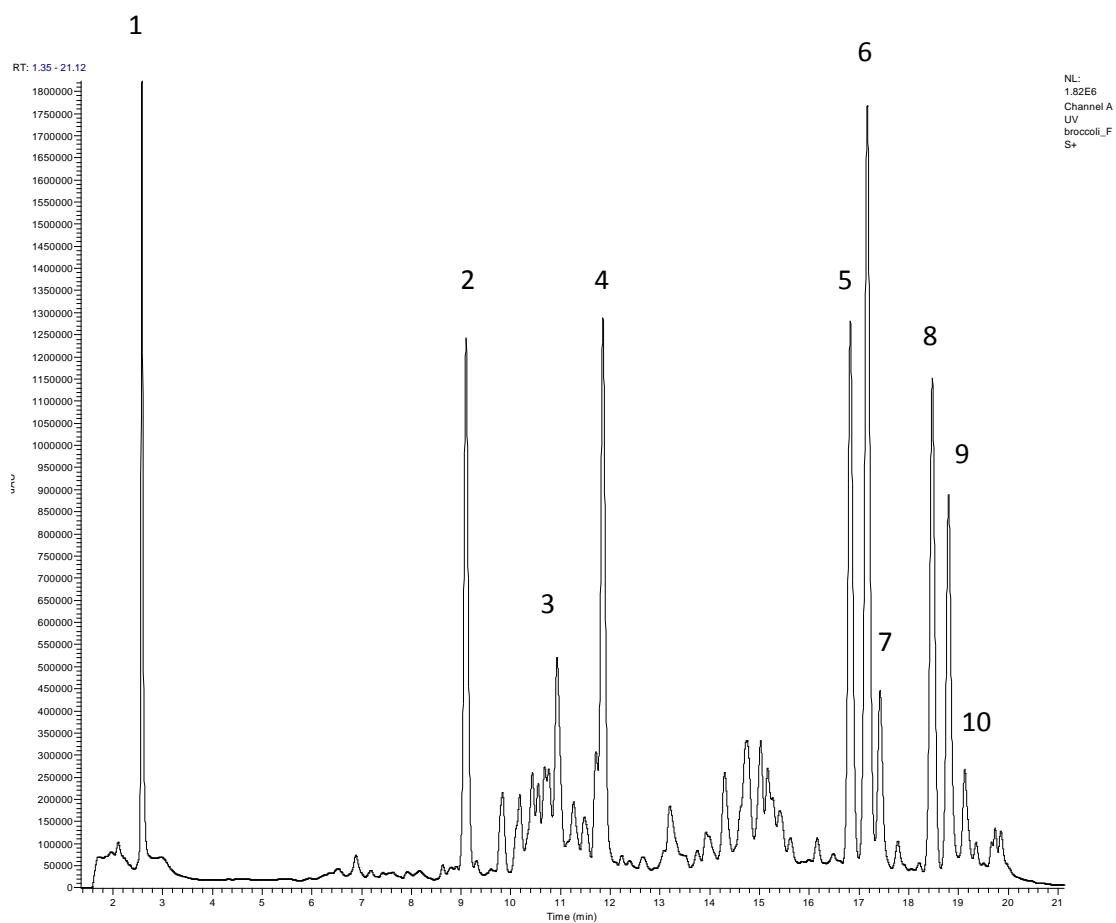

**Figure S1**

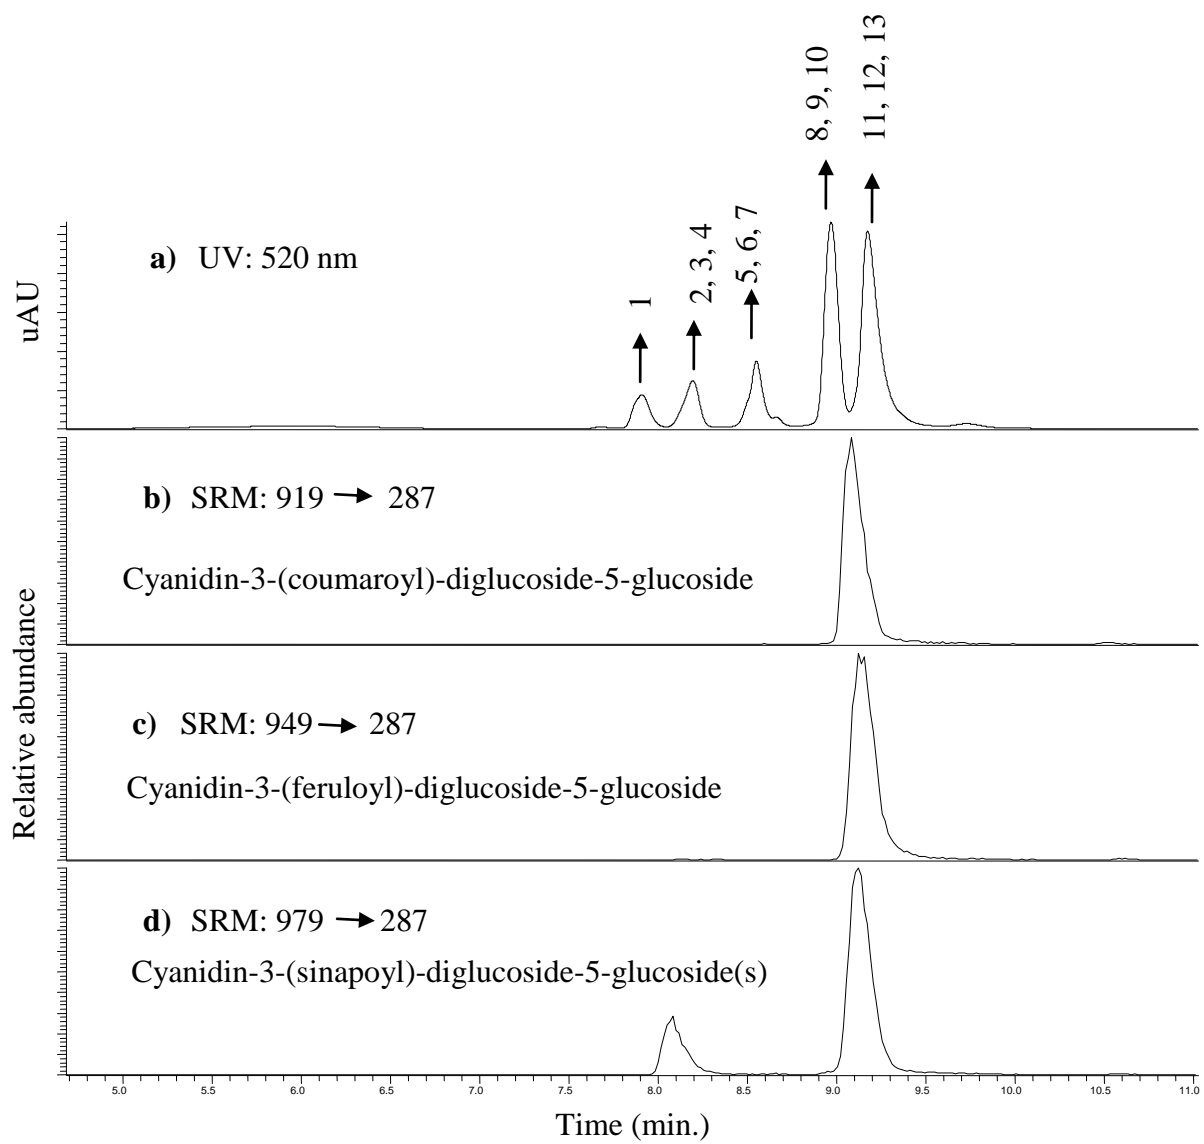

**Figure S2**

### Figure legends

Fig. S1. Reverse-phase HPLC chromatogram of a whole extract from broccoli detected at 320 nm. Major peaks are numbered according to Table S3.

Fig. S2. Reverse-phase HPLC chromatogram of a whole extract from red cabbage detected at 520 nm a) and illustration of co-elution between anthocyanins acylated with various phenolic acids resolved by selected reaction monitoring (SRM) mass spectrometry (b-d). Major peaks are numbered according to Table S4.
